## **Correction: Polarized cell migration induces cancer type-specific CD133/integrin/Src/Akt/GSK3 $\beta$ / $\beta$ -catenin signaling required for maintenance of cancer stem cell properties**

**Ying-Jhen Su, Wei-Hsin Lin, Yi-Wen Chang, Kuo-Chen Wei, Chi-Lung Liang, Shin-Cheh Chen and Jia-Lin Lee**

Present: Due to an error made during submission of the revised manuscript, Dr. Chi-Jung Liang's name was spelled incorrectly.

Corrected: The correct author list for this manuscript is provided below. Authors sincerely apologize for this oversight.

Original article: Oncotarget. 2015; 6(35): 38029-45. doi: 10.18632/oncotarget.5703.

**Ying-Jhen Su<sup>1,\*</sup>, Wei-Hsin Lin<sup>1,2,\*</sup>, Yi-Wen Chang<sup>1,\*</sup>, Kuo-Chen Wei<sup>3</sup>, Chi-Jung Liang<sup>1</sup>, Shin-Cheh Chen<sup>4</sup> and Jia-Lin Lee<sup>1,5</sup>**

<sup>1</sup> Institute of Molecular and Cellular Biology, National Tsing Hua University, Hsinchu, Taiwan

<sup>2</sup> Department of Orthopedics, National Taiwan University Hospital Hsin-Chu Branch, Hsinchu, Taiwan

<sup>3</sup> Department of Neurosurgery, Chang-Gung Memorial Hospital, Linkou, Taiwan

<sup>4</sup> Department of Surgery, Chang-Gung Memorial Hospital, Linkou, Taiwan

<sup>5</sup> Department of Medical Science, National Tsing Hua University, Hsinchu, Taiwan

\* These authors have contributed equally to this work
